# Supplementary material for: Longitudinal Changes in Diet Cause Repeatable and Largely Reversible Shifts in Gut Microbial Communities of Laboratory Mice and Are Observed across Segments of the Entire Intestinal Tract
Source: MDPI journal article supplement (doi:10.3390/ijms22115981), 2021-06-01
Supplement: s1 [file s1]

Table S4A. Pairwise PERMANOVA test comparing weighted-UniFrac distances between segments of western diet and standard diet.

| Group 1 Western diet | Group 2 Standard diet | Sample size | Permutations | pseudo-F | p-value | q-value |
|----------------------|-----------------------|-------------|--------------|----------|---------|---------|
| Stomach              | Stomach               | 24          | 9999         | 11.592   | 0.0004  | 0.0009  |
| Duodenum             | Duodenum              | 23          | 9999         | 10.843   | 0.0008  | 0.0015  |
| Jejunum              | Jejunum               | 24          | 9999         | 19.428   | 0.0001  | 0.0003  |
| Ileum                | Ileum                 | 21          | 9999         | 7.624    | 0.0002  | 0.0005  |
| Cecum                | Cecum                 | 24          | 9999         | 14.570   | 0.0001  | 0.0003  |
| Colon                | Colon                 | 24          | 9999         | 18.502   | 0.0002  | 0.0005  |
| Fecal                | Fecal                 | 24          | 9999         | 25.171   | 0.0002  | 0.0005  |

Red highlights significance FDR-adjusted  $q$ -value < 0.05

Table S4B. Pairwise PERMANOVA test comparing weighted-UniFrac distances between segments of western diet.

| Group 1  | Group 2  | Sample size | Permutations | pseudo-F | p-value | q-value |
|----------|----------|-------------|--------------|----------|---------|---------|
| Stomach  | Duodenum | 23          | 9999         | 12.380   | 0.0003  | 0.0007  |
|          | Jejunum  | 24          | 9999         | 3.863    | 0.0088  | 0.0129  |
|          | Ileum    | 22          | 9999         | 6.731    | 0.0006  | 0.0012  |
|          | Cecum    | 24          | 9999         | 15.685   | 0.0002  | 0.0005  |
|          | Colon    | 24          | 9999         | 5.5668   | 0.0086  | 0.0129  |
|          | Fecal    | 24          | 9999         | 3.6474   | 0.0372  | 0.0451  |
| Duodenum | Jejunum  | 24          | 9999         | 3.220    | 0.0353  | 0.0434  |
|          | Ileum    | 22          | 9999         | 7.472    | 0.0016  | 0.0030  |
|          | Cecum    | 24          | 9999         | 18.079   | 0.0002  | 0.0005  |
|          | Colon    | 23          | 9999         | 6.088    | 0.0072  | 0.0115  |
|          | Fecal    | 24          | 9999         | 3.351    | 0.04    | 0.0473  |
|          | Ileum    | 22          | 9999         | 2.943    | 0.0617  | 0.0702  |
| Jejunum  | Cecum    | 24          | 9999         | 32.093   | 0.0001  | 0.0003  |
|          | Colon    | 24          | 9999         | 15.379   | 0.0001  | 0.0003  |
|          | Fecal    | 24          | 9999         | 8.971    | 0.0017  | 0.0032  |
| Ileum    | Cecum    | 22          | 9999         | 36.288   | 0.0001  | 0.0003  |
|          | Colon    | 22          | 9999         | 21.775   | 0.0001  | 0.0003  |
|          | Fecal    | 22          | 9999         | 13.828   | 0.0002  | 0.0005  |
| Cecum    | Colon    | 24          | 9999         | 3.372    | 0.0471  | 0.0550  |
|          | Fecal    | 24          | 9999         | 4.256961 | 0.0330  | 0.0411  |
| Colon    | Fecal    | 24          | 9999         | 0.695824 | 0.4275  | 0.4275  |

Red highlights significance FDR-adjusted  $q$ -value < 0.05

Table S4C. Pairwise PERMANOVA test comparing weighted-UniFrac distances between segments of standard diet.

| Group 1  | Group 2  | Sample size | Permutations | pseudo-F | p-value | q-value |
|----------|----------|-------------|--------------|----------|---------|---------|
| Stomach  | Duodenum | 23          | 9999         | 1.7552   | 0.1684  | 0.1782  |
|          | Jejunum  | 24          | 9999         | 1.4433   | 0.2185  | 0.2285  |
|          | Ileum    | 23          | 9999         | 4.311    | 0.019   | 0.0251  |
|          | Cecum    | 24          | 9999         | 2.783    | 0.0646  | 0.073   |
|          | Colon    | 24          | 9999         | 4.379    | 0.0201  | 0.026   |
|          | Fecal    | 24          | 9999         | 9.071    | 0.001   | 0.001   |
| Duodenum | Jejunum  | 23          | 9999         | 0.950    | 0.3612  | 0.369   |
|          | Ileum    | 22          | 9999         | 4.709    | 0.0185  | 0.025   |
|          | Cecum    | 23          | 9999         | 5.500    | 0.0018  | 0.003   |
|          | Colon    | 23          | 9999         | 2.367    | 0.1028  | 0.111   |
|          | Fecal    | 23          | 9999         | 3.840    | 0.0298  | 0.038   |
|          | Ileum    | 23          | 9999         | 1.258    | 0.2696  | 0.279   |
| Jejunum  | Cecum    | 24          | 9999         | 6.284    | 0.0038  | 0.007   |
|          | Colon    | 24          | 9999         | 5.879    | 0.0077  | 0.012   |
|          | Fecal    | 24          | 9999         | 8.637    | 0.0024  | 0.004   |
| Ileum    | Cecum    | 23          | 9999         | 15.158   | 0.0001  | 0.0003  |
|          | Colon    | 23          | 9999         | 14.750   | 0.0005  | 0.001   |
|          | Fecal    | 23          | 9999         | 20.198   | 0.0001  | 0.0003  |
| Cecum    | Colon    | 24          | 9999         | 5.394    | 0.0079  | 0.0122  |
|          | Fecal    | 24          | 9999         | 12.125   | 0.0001  | 0.0003  |
| Colon    | Fecal    | 24          | 9999         | 1.908    | 0.1302  | 0.139   |

Red highlights significance FDR-adjusted  $q$ -value < 0.05

Table S4D. Wilcoxon rank sum test of E.C. numbers between small and large intestines.

| #OTU ID         | E.C. description                                         | Small intestine (n=68): mean rel. freq. (%) | Small intestine: std. dev. (%) | Large intestine (n=48): mean rel. freq. (%) | Large intestine: std. dev. (%) | q-values | Difference between means |
|-----------------|----------------------------------------------------------|---------------------------------------------|--------------------------------|---------------------------------------------|--------------------------------|----------|--------------------------|
| small intestine |                                                          |                                             |                                |                                             |                                |          |                          |
| EC:2.1.1.172    | 16S rRNA (guanine(1207)-N(2))-methyltransferase          | 0.119                                       | 0.045                          | 0.032                                       | 0.024                          | 2.80E-15 | -0.086087074             |
| EC:2.7.1.69     | Protein-N(pi)-phosphohistidine-sugar phosphotransferase  | 1.198                                       | 0.402                          | 0.420                                       | 0.226                          | 1.70E-15 | -0.778239965             |
| EC:2.7.2.1      | Acetate kinase                                           | 0.295                                       | 0.051                          | 0.195                                       | 0.028                          | 1.30E-15 | -0.09946786              |
| EC:2.7.4.9      | dTMP kinase                                              | 0.142                                       | 0.041                          | 0.069                                       | 0.023                          | 3.80E-14 | -0.07365658              |
| EC:2.3.1.157    | Glucosamine-1-phosphate N-acetyltransferase              | 0.142                                       | 0.041                          | 0.061                                       | 0.028                          | 1.10E-14 | -0.08091178              |
| EC:2.7.1.40     | Pyruvate kinase                                          | 0.263                                       | 0.049                          | 0.194                                       | 0.033                          | 5.60E-11 | -0.068373731             |
| EC:3.1.26.8     | Ribonuclease M5                                          | 0.131                                       | 0.043                          | 0.055                                       | 0.028                          | 3.80E-14 | -0.076144848             |
| EC:3.1.3.41     | 4-nitrophenylphosphatase                                 | 0.117                                       | 0.045                          | 0.031                                       | 0.024                          | 1.70E-15 | -0.08637269              |
| EC:3.2.1.86     | 6-phospho-beta-glucosidase                               | 0.718                                       | 0.229                          | 0.292                                       | 0.143                          | 5.10E-14 | -0.425569963             |
| large intestine |                                                          |                                             |                                |                                             |                                |          |                          |
| EC:1.1.1.29     | Glycerate dehydrogenase                                  | 0.046                                       | 0.032                          | 0.117                                       | 0.019                          | <2e-16   | 0.070757561              |
| EC:1.1.1.69     | Gluconate 5-dehydrogenase                                | 0.032                                       | 0.032                          | 0.081                                       | 0.037                          | 1.40E-10 | 0.048615846              |
| EC:1.4.1.16     | Diaminopimelate dehydrogenase                            | 0.036                                       | 0.035                          | 0.096                                       | 0.018                          | 2.20E-13 | 0.059361116              |
| EC:2.1.1.132    | Precorrin-6B C(5,15)-methyltransferase (decarboxylating) | 0.019                                       | 0.027                          | 0.074                                       | 0.030                          | 2.50E-14 | 0.054808625              |
| EC:4.1.1.3      | Oxaloacetate decarboxylase                               | 0.061                                       | 0.068                          | 0.225                                       | 0.046                          | 2.80E-16 | 0.163974128              |
| EC:4.2.1.7      | Altronate dehydratase                                    | 0.028                                       | 0.027                          | 0.065                                       | 0.020                          | 1.60E-10 | 0.036660183              |
| EC:4.2.3.3      | Methylglyoxal synthase                                   | 0.068                                       | 0.048                          | 0.152                                       | 0.030                          | 7.10E-14 | 0.08391944               |

Red highlights significance FDR-adjusted  $q$ -value < 0.05
