# Supplementary material for: Longitudinal Changes in Diet Cause Repeatable and Largely Reversible Shifts in Gut Microbial Communities of Laboratory Mice and Are Observed across Segments of the Entire Intestinal Tract
Source: MDPI journal article supplement (doi:10.3390/ijms22115981), 2021-06-01
Supplement: s1 [file s1]

Table S2A. PERMANOVA tests of the weighted-UniFrac distance of fecal samples.

| Group 1                                                 | Group 2                                                 | Sample size | Permutations | pseudo-F | p-value | q-value |
|---------------------------------------------------------|---------------------------------------------------------|-------------|--------------|----------|---------|---------|
| Treatment group day 27, end of 1st western diet regimen | Control group day 27                                    | 9999        |              | 61.204   | 0.0001  | 0.0003  |
| Treatment group day 55, end of standard diet regimen    | Control group day 55                                    | 9999        |              | 1.854    | 0.1501  | 0.1501  |
| Treatment group day 83, end of 2nd western diet regimen | Control group day 83                                    | 9999        |              | 21.354   | 0.0001  | 0.0003  |
| Treatment group day 27, end of 1st western diet regimen | Treatment group day 83, end of 2nd western diet regimen | 24          | 9999         | 3.143    | 0.072   | 0.0005  |
| Control group day 27                                    | Control group day 83                                    | 24          | 9999         | 4.159    | 0.023   | 0.032   |

Red highlights significance FDR-adjusted q-value < 0.05

Table S2B. Wilcoxon rank sum test comparing Shannon index between different GIT segments and diets.

| Segment, Diet      | Cecum, Standard | Cecum, Western | Colon, Standard | Colon, Western | Duodenum, Standard | Duodenum, Western | Fecal, Standard | Fecal, Western | Ileum, Standard | Ileum, Western | Jejunum, Standard | Jejunum, Western | Stomach, Standard |
|--------------------|-----------------|----------------|-----------------|----------------|--------------------|-------------------|-----------------|----------------|-----------------|----------------|-------------------|------------------|-------------------|
| Cecum, Western     | 0.00017         | -              | -               | -              | -                  | -                 | -               | -              | -               | -              | -                 | -                | -                 |
| Colon, Standard    | 0.01725         | 0.23685        | -               | -              | -                  | -                 | -               | -              | -               | -              | -                 | -                | -                 |
| Colon, Western     | 9.60E-08        | 0.00938        | 0.00406         | -              | -                  | -                 | -               | -              | -               | -              | -                 | -                | -                 |
| Duodenum, Standard | 0.00279         | 0.18782        | 0.05406         | 0.77392        | -                  | -                 | -               | -              | -               | -              | -                 | -                | -                 |
| Duodenum, Western  | 6.70E-06        | 9.20E-05       | 6.70E-06        | 0.00039        | 0.00938            | -                 | -               | -              | -               | -              | -                 | -                | -                 |
| Fecal, Standard    | 0.00013         | 0.40012        | 0.21019         | 0.0049         | 0.16879            | 6.70E-06          | -               | -              | -               | -              | -                 | -                | -                 |
| Fecal, Western     | 6.70E-06        | 0.00091        | 0.00094         | 0.29872        | 0.20821            | 0.08488           | 0.00091         | -              | -               | -              | -                 | -                | -                 |
| Ileum, Standard    | 6.6E-06         | 0.00011        | 8.10E-05        | 0.00704        | 0.00943            | 0.40012           | 0.00E-05        | 0.0848         | -               | -              | -                 | -                | -                 |
| Ileum, Western     | 1.70E-05        | 3.10E-05       | 1.70E-05        | 0.00029        | 0.00022            | 0.03779           | 1.70E-05        | 0.01007        | 0.75308         | -              | -                 | -                | -                 |
| Jejunum, Standard  | 3.60E-06        | 0.002          | 0.0004          | 6.13E-05       | 0.11981            | 0.48007           | 0.00041         | 0.75306        | 0.11981         | 0.00746        | -                 | -                | -                 |
| Jejunum, Western   | 9.60E-06        | 6.60E-06       | 6.70E-06        | 0.23E-05       | 0.00015            | 0.0424            | 0.01007         | 0.81274        | 0.92287         | 0.02797        | -                 | -                | -                 |
| Stomach, Standard  | 0.00001         | 0.89725        | 0.84673         | 0.11981        | 0.4315             | 0.00157           | 0.81869         | 0.03215        | 0.00054         | 0.02001        | 0.00054           | -                | -                 |
| Stomach, Western   | 6.70E-06        | 0.00017        | 6.70E-06        | 0.0373         | 0.05405            | 0.16386           | 6.70E-06        | 0.61168        | 0.09488         | 0.0145         | 0.75308           | 0.00031          | 0.00704           |

Red highlights significance FDR-adjusted q-value < 0.05

Table S2C. Wilcoxon rank sum test comparing Simpson index between different GIT segments and diets.

| Segment, Diet      | Cecum, Standard | Cecum, Western | Colon, Standard | Colon, Western | Duodenum, Standard | Duodenum, Western | Fecal, Standard | Fecal, Western | Ileum, Standard | Ileum, Western | Jejunum, Standard | Jejunum, Western | Stomach, Standard |
|--------------------|-----------------|----------------|-----------------|----------------|--------------------|-------------------|-----------------|----------------|-----------------|----------------|-------------------|------------------|-------------------|
| Cecum, Western     | 1.25E-03        | -              | -               | -              | -                  | -                 | -               | -              | -               | -              | -                 | -                | -                 |
| Colon, Standard    | 1.48E-01        | 2.57E-01       | -               | -              | -                  | -                 | -               | -              | -               | -              | -                 | -                | -                 |
| Colon, Western     | 1.30E-05        | 2.50E-02       | 4.07E-03        | -              | -                  | -                 | -               | -              | -               | -              | -                 | -                | -                 |
| Duodenum, Standard | 1.30E-02        | 6.44E-01       | 1.68E-01        | 2.93E-01       | -                  | -                 | -               | -              | -               | -              | -                 | -                | -                 |
| Duodenum, Western  | 1.10E-05        | 4.30E-04       | 1.30E-05        | 7.88E-02       | 1.91E-02           | -                 | -               | -              | -               | -              | -                 | -                | -                 |
| Fecal, Standard    | 3.97E-02        | 1.64E-01       | 9.18E-01        | 2.43E-04       | 1.38E-01           | 1.10E-05          | -               | -              | -               | -              | -                 | -                | -                 |
| Fecal, Western     | 1.20E-04        | 2.18E-02       | 1.90E-03        | 7.35E-01       | 2.71E-01           | 3.54E-01          | 1.00E-03        | -              | -               | -              | -                 | -                | -                 |
| Ileum, Standard    | 1.30E-05        | 1.30E-03       | 3.00E-04        | 9.67E-02       | 1.32E-02           | 4.95E-01          | 6.70E-05        | 2.05E-01       | -               | -              | -                 | -                | -                 |
| Ileum, Western     | 2.20E-05        | 4.00E-04       | 2.20E-05        | 2.38E-02       | 5.51E-03           | 2.88E-01          | 2.20E-05        | 9.67E-02       | 9.18E-01        | 1.33E-01       | -                 | -                | -                 |
| Jejunum, Standard  | 8.00E-05        | 3.97E-02       | 4.07E-03        | 6.07E-01       | 1.38E-01           | 6.55E-01          | 1.25E-03        | 9.38E-01       | 1.97E-01        | 1.33E-01       | -                 | -                | -                 |
| Jejunum, Western   | 1.10E-05        | 1.70E-04       | 1.30E-05        | 6.02E-03       | 8.10E-04           | 1.25E-01          | 1.10E-05        | 7.88E-02       | 9.38E-01        | 9.38E-01       | 6.30E-02          | -                | -                 |
| Stomach, Standard  | 1.48E-01        | 7.72E-01       | 7.35E-01        | 1.38E-01       | 6.13E-01           | 1.55E-02          | 8.55E-01        | 8.74E-02       | 1.81E-02        | 5.51E-03       | 7.95E-02          | 1.50E-03         | -                 |
| Stomach, Western   | 1.10E-05        | 1.00E-05       | 6.00E-05        | 2.38E-01       | 6.55E-02           | 3.54E-01          | 1.10E-05        | 7.35E-01       | 2.50E-01        | 8.94E-02       | 9.77E-01          | 1.33E-02         | 3.49E-02          |

Red highlights significance FDR-adjusted q-value < 0.05

Table S2D. Wilcoxon rank sum test comparing Chao1 index between different GIT segments and diets.

| Segment, Diet      | Cecum, Standard | Cecum, Western | Colon, Standard | Colon, Western | Duodenum, Standard | Duodenum, Western | Fecal, Standard | Fecal, Western | Ileum, Standard | Ileum, Western | Jejunum, Standard | Jejunum, Western | Stomach, Standard |
|--------------------|-----------------|----------------|-----------------|----------------|--------------------|-------------------|-----------------|----------------|-----------------|----------------|-------------------|------------------|-------------------|
| Cecum, Western     | 4.00E-06        | -              | -               | -              | -                  | -                 | -               | -              | -               | -              | -                 | -                | -                 |
| Colon, Standard    | 5.31E-02        | 1.49E-03       | -               | -              | -                  | -                 | -               | -              | -               | -              | -                 | -                | -                 |
| Colon, Western     | 4.00E-06        | 2.88E-02       | 2.90E-05        | -              | -                  | -                 | -               | -              | -               | -              | -                 | -                | -                 |
| Duodenum, Standard | 6.10E-06        | 6.94E-02       | 4.50E-04        | 1.17E-01       | -                  | -                 | -               | -              | -               | -              | -                 | -                | -                 |
| Duodenum, Western  | 4.00E-06        | 4.00E-06       | 4.00E-06        | 6.10E-06       | 1.65E-03           | -                 | -               | -              | -               | -              | -                 | -                | -                 |
| Fecal, Standard    | 4.00E-06        | 4.00E-06       | 4.00E-06        | 4.00E-06       | 5.31E-02           | 1.84E-03          | -               | -              | -               | -              | -                 | -                | -                 |
| Fecal, Western     | 4.00E-06        | 4.00E-06       | 4.00E-06        | 4.00E-06       | 1.34E-03           | 9.53E-01          | 2.29E-03        | -              | -               | -              | -                 | -                | -                 |
| Ileum, Standard    | 6.10E-06        | 6.10E-06       | 6.10E-06        | 1.20E-05       | 3.71E-03           | 9.77E-01          | 1.61E-02        | 5.50E-01       | -               | -              | -                 | -                | -                 |
| Ileum, Western     | 2.20E-04        | 2.20E-04       | 2.20E-04        | 3.00E-04       | 1.49E-03           | 2.20E-04          | 5.30E-04        | 7.92E-03       | -               | -              | -                 | -                | -                 |
| Jejunum, Standard  | 4.00E-06        | 1.48E-05       | 4.90E-05        | 1.97E-02       | 7.78E-01           | 2.31E-02          | 7.81E-03        | 5.31E-02       | 2.88E-02        | 8.10E-04       | -                 | -                | -                 |
| Jejunum, Western   | 1.10E-04        | 1.10E-04       | 1.10E-04        | 9.60E-04       | 2.38E-01           | 7.70E-04          | 7.84E-02        | 3.93E-01       | 1.41E-02        | 6.30E-03       | -                 | -                | -                 |
| Stomach, Standard  | 2.10E-04        | 3.90E-02       | 7.84E-02        | 2.80E-03       | 2.46E-02           | 4.50E-04          | 6.00E-04        | 8.10E-04       | 2.62E-03        | 1.10E-03       | -                 | -                | -                 |
| Stomach, Western   | 4.00E-06        | 4.00E-06       | 4.00E-06        | 4.00E-06       | 2.55E-01           | 3.70E-02          | 2.20E-03        | 1.97E-02       | 3.90E-02        | 2.24E-03       | 9.77E-01          | 1.22E-02         | 3.50E-04          |

Red highlights significance FDR-adjusted q-value < 0.05

Table S2E. Pairwise phylum level Wilcoxon rank sum test between treatment and control groups.

| Segment, Diet                   | Actinobacteriota, Standard diet | Bacteroidota, Standard diet | Cyanobacteria, Standard diet | Firmicutes, Standard diet | Proteobacteria, Standard diet | Verrucomicrobiota, Standard diet |
|---------------------------------|---------------------------------|-----------------------------|------------------------------|---------------------------|-------------------------------|----------------------------------|
| Actinobacteriota, Western diet  | 3.40E-05                        | -                           | -                            | -                         | -                             | -                                |
| Bacteroidota, Western diet      | -                               | 4.80E-13                    | -                            | -                         | -                             | -                                |
| Cyanobacteria, Western diet     | -                               | -                           | 2.10E-11                     | -                         | -                             | -                                |
| Firmicutes, Western diet        | -                               | -                           | -                            | 1.70E-13                  | -                             | -                                |
| Proteobacteria, Western diet    | -                               | -                           | -                            | -                         | 0.31                          | -                                |
| Verrucomicrobiota, Western diet | -                               | -                           | -                            | -                         | -                             | 7.00E-06                         |

Red highlights significance FDR-adjusted q-value < 0.05

Table S2F. Family level Wilcoxon rank sum test between treatment and control groups.

|                                      | mean rel. abundance ± standard deviation | WD (n = 82)    | SD (n = 82) | Wilcoxon B.H correction q-value |
|--------------------------------------|------------------------------------------|----------------|-------------|---------------------------------|
| <b>Firmicutes</b>                    |                                          |                |             |                                 |
| Evippotrichaceae                     | 55.4 ± 19.86                             | 30.21 ± 26.15  | 1.00E-09    |                                 |
| Streptococcaceae                     | 8.8 ± 19.21                              | 0.462 ± 2.30   | <2e-16      |                                 |
| Clostridiaceae                       | 4.51 ± 7.02                              | 0.018 ± 0.06   | <2e-16      |                                 |
| [Eubacterium]_coproslandigenes_group | 1.03 ± 1.19                              | 0.15 ± 0.16    | 8.30E-06    |                                 |
| Enterococcaceae                      | 0.125 ± 0.54                             | 0              | 2.80E-07    |                                 |
| Christensenellaceae                  | 0.0765 ± 0.11                            | 0.0003 ± 0.003 | 2.30E-13    |                                 |
| Staphylococcaceae                    | 0.037 ± 0.01                             | 0.01 ± 0.04    | 0.00011     |                                 |
| Lachnospiraceae                      | 19.91 ± 12.82                            | 24.76 ± 20.07  | 1.30E-08    |                                 |
| Lactobacillaceae                     | 2.23 ± 12.5                              | 8.86 ± 4.62    | 8.10E-11    |                                 |
| Clostridia_UCG-014                   | 0.042 ± 0.12                             | 0.51 ± 0.57    | <2e-16      |                                 |
| Butyristocaceae                      | 0.029 ± 0.084                            | 0.331 ± 0.34   | 1.90E-14    |                                 |
| Clostridia_vadinB860_group           | 0.14 ± 0.44                              | 0.30 ± 0.41    | 3.10E-05    |                                 |
| Actinoplasmataceae                   | 0.0009 ± 0.007                           | 0.146 ± 0.239  | 1.90E-14    |                                 |
| Monosporaceae                        | 0                                        | 0.12 ± 0.13    | <2e-16      |                                 |
| RF30                                 | 0.005 ± 0.02                             | 0.064 ± 0.107  | 2.50E-08    |                                 |
| Peptococcaceae                       | 0.013 ± 0.031                            | 0.035 ± 0.059  | 6.80E-03    |                                 |
| Oscillospiraceae                     | 2.12 ± 2.66                              | 1.42 ± 1.76    | 0.32        |                                 |
| Anaerovoracaceae                     | 0.66 ± 0.1                               | 0.07 ± 0.08    | 0.28        |                                 |
| Ruminococcaceae                      | 0.59 ± 0.83                              | 0.51 ± 0.51    | 0.24        |                                 |
| Evippotrichiidae                     | 0.35 ± 0.43                              | 0.263 ± 0.30   | 0.51        |                                 |
| Lactococcaceae                       | 0                                        | 0.002 ± 0.012  | 0.083       |                                 |
| <b>Bacteroidota</b>                  |                                          |                |             |                                 |
| Bacteroidaceae                       | 0                                        | 0.74 ± 1.72    | 1.10E-06    |                                 |
| Rikenellaceae                        | 0.33 ± 8.32                              | 2.64 ± 2.62    | 2.90E-16    |                                 |
| Muribaculaceae                       | 11.33 ± 8.32                             | 24.51 ± 14.27  | 3.90E-05    |                                 |
| <b>Actinobacteriota</b>              |                                          |                |             |                                 |
| Bifidobacteriaceae                   | 0.96 ± 0.80                              | 2.63 ± 3.94    | 3.90E-03    |                                 |
| Coriobacteriales_Incertae_Sedis      | 0                                        | 0.0014 ± 0.007 | 4.40E-02    |                                 |
| Eggerthellaceae                      | 0.32 ± 0.30                              | 0.61 ± 0.63    | 3.60E-08    |                                 |
| Intrasporangiaceae                   | 0.004 ± 0.003                            | 0.0004 ± 0.024 | 0.56        |                                 |
| Microbacteriaceae                    | 0                                        | 0.002 ± 0.0013 | 0.16        |                                 |
| <b>Cyanobacteria</b>                 |                                          |                |             |                                 |
| Gastreaerophilales                   | 0                                        | 0.33 ± 0.59    | 2.10E-11    |                                 |
| <b>Proteobacteria</b>                |                                          |                |             |                                 |
| Beijerinckiaceae                     | 0.005 ± 0.047                            | 0.0009 ± 0.008 | 0.31        |                                 |
| Sphingomonadaceae                    | 0.002 ± 0.016                            | 0.0009 ± 0.007 | 1           |                                 |
| <b>Verrucomicrobiota</b>             |                                          |                |             |                                 |
| Akkermansiaceae                      | 0.393 ± 0.74                             | 0.06 ± 0.24    | 7.00E-06    |                                 |

Red highlights significance FDR-adjusted q-value < 0.05

Blue indicates significantly higher mean for WD

Green indicates significantly higher mean for SD

Table S2G. Wilcoxon rank sum test between ratios of Firmicutes, Bacteroidota ASV counts.

|                            | Stomach, Control (n=12) | Colon, Control (n=12) | Jejunum, Control (n=12) | Stomach, Control (n=11) | Colon, Control (n=12) | Fecal, Control (n=12) |
|----------------------------|-------------------------|-----------------------|-------------------------|-------------------------|-----------------------|-----------------------|
| Stomach, Treatment (n=12)  | 9.48E-03                | -                     | -                       | -                       | -                     | -                     |
| Duodenum, Treatment (n=12) | -                       | 1.91E-02              | -                       | -                       | -                     | -                     |
| Jejunum, Treatment (n=12)  | -                       | -                     | 2.06E-03                | -                       | -                     | -                     |
| Ileum, Treatment (n=10)    | -                       | -                     | -                       | 1.84E-03                | -                     | -                     |
| Colon, Treatment (n=12)    | -                       | -                     | -                       | -                       | 4.21E-03              | -                     |
| Colon, Treatment (n=12)    | -                       | -                     | -                       | -                       | -                     | 4.10E-04              |
| Fecal, Treatment (n=12)    | -                       | -                     | -                       | -                       | -                     | 7.70E-05              |

Red highlights significance FDR-adjusted q-value < 0.05

Table S2H. Wilcoxon rank sum test of NST1 values between segments and diets

| Segment, Diet            | Stomach, Standard (n=12) | Colon, Standard (n=11) | Jejunum, Standard (n=12) | Ileum, Standard (n=11) | Cecum, Standard (n=12) | Colon, Standard (n=12) |
|--------------------------|--------------------------|------------------------|--------------------------|------------------------|------------------------|------------------------|
| Stomach, Western (n=12)  | 0.012                    | -                      | -                        | -                      | -                      | -                      |
| Duodenum, Western (n=12) | -                        | 0.0045                 | -                        | -                      | -                      | -                      |
| Jejunum, Western (n=12)  | -                        | -                      | 0.0068                   | -                      | -                      | -                      |
| Ileum, Western (n=10)    | -                        | -                      | -                        | 0.11                   | -                      | -                      |
| Cecum, Western (n=12)    | -                        | -                      | -                        | -                      | 1.40E-05               | -                      |
| Colon, Western (n=12)    | -                        | -                      | -                        | -                      | -                      | 3.30E-05               |

Red highlights significance FDR-adjusted q-value < 0.05
