# Supplementary material for: Longitudinal Changes in Diet Cause Repeatable and Largely Reversible Shifts in Gut Microbial Communities of Laboratory Mice and Are Observed across Segments of the Entire Intestinal Tract
Source: MDPI journal article supplement (doi:10.3390/ijms22115981), 2021-06-01
Supplement: s1 [file s1]

**Table S5A. ANCOM analysis of differentially abundant ASVs within segments of treatment and control group.**

| ASV ID          | BLASTn identity                                     | chr     | W   |
|-----------------|-----------------------------------------------------|---------|-----|
| <b>Stomach</b>  |                                                     |         |     |
| ASV-834         | Lactococcus taiwanensis strain 0905C15              | 8.15    | 435 |
| ASV-654         | Clostridium saudeianae strain JCC                   | 7.51    | 435 |
| ASV-578         | Clostridium saudeianae strain JCC                   | 6.51    | 432 |
| ASV-479         | Clostridium saudeianae strain JCC                   | 5.83    | 427 |
| ASV-756         | Clostridium saudeianae strain JCC                   | 5.43    | 421 |
| ASV-540         | Turbidibacter sanguinis strain MCL361               | 5.37    | 391 |
| ASV-603         | [Clostridium] scindens strain ATCC 35704            | 5.05    | 425 |
| ASV-542         | [Eubacterium] rectale ATCC 35686                    | 4.94    | 424 |
| ASV-678         | [Clostridium] scindens strain ATCC 35704            | 4.57    | 375 |
| ASV-815         | [Clostridium] asparagiforme strain N6               | 4.19    | 381 |
| ASV-635         | Anaerodigium lactifallicum strain G17               | 3.64    | 371 |
| ASV-501         | [Clostridium] scindens strain ATCC 35704            | 3.63    | 381 |
| ASV-654         | Kineothrix alysoides strain KNHc209                 | 3.38    | 380 |
| ASV-862         | Acetatifactor muris strain CT-m2                    | 3.45    | 357 |
| ASV-546         | [Clostridium] scindens strain ATCC 35704            | 3.45    | 372 |
| ASV-628         | Anaerostipes caecae strain L1-62                    | 3.40    | 366 |
| ASV-791         | Neglecta timonensis strain SN17                     | 3.24    | 368 |
| ASV-651         | [Clostridium] scindens strain ATCC 35704            | 3.01    | 353 |
| ASV-792         | Bacteroides xylophilus strain X5-1                  | -3.32   | 353 |
| ASV-895         | Eisenbergella tay strain B060562                    | -3.39   | 358 |
| ASV-708         | Acetatifactor muris strain CT-m2                    | -3.46   | 352 |
| ASV-574         | Blautia faecicola strain KCMDB1111                  | -3.75   | 380 |
| ASV-644         | Lachnospirillum pacemense strain Marseille-P3100    | -3.92   | 377 |
| ASV-517         | [Clostridium] scindens strain ATCC 35704            | -4.38   | 380 |
| ASV-746         | Duncanelia dubosi strain H5                         | -4.54   | 397 |
| ASV-733         | Kineothrix alysoides strain KNHc209                 | -4.80   | 427 |
| ASV-649         | [Clostridium] asparagiforme strain N6               | -4.95   | 407 |
| ASV-526         | Atlepis onderdonki strain JCM 16771                 | -5.47   | 429 |
| <b>Duodenum</b> |                                                     |         |     |
| ASV-834         | Lactococcus taiwanensis strain 0905C15              | 7.48    | 365 |
| ASV-654         | Clostridium saudeianae strain JCC                   | 6.58    | 365 |
| ASV-540         | Turbidibacter sanguinis strain MCL361               | 6.00    | 349 |
| ASV-733         | Kineothrix alysoides strain KNHc209                 | -4.70   | 346 |
| ASV-517         | [Clostridium] scindens strain ATCC 35704            | -4.74   | 345 |
| ASV-746         | Duncanelia dubosi strain H5                         | -5.48   | 369 |
| <b>Jejunum</b>  |                                                     |         |     |
| ASV-834         | Lactococcus taiwanensis strain 0905C15              | 8.84978 | 328 |
| ASV-654         | Clostridium saudeianae strain JCC                   | 6.42407 | 327 |
| ASV-540         | Turbidibacter sanguinis strain MCL361               | 5.77653 | 321 |
| ASV-578         | Clostridium saudeianae strain JCC                   | 5.19445 | 327 |
| ASV-479         | Clostridium saudeianae strain JCC                   | 3.57336 | 291 |
| ASV-756         | Clostridium saudeianae strain JCC                   | 3.38828 | 290 |
| ASV-496         | Asaccharobacter celatus strain JCM 14811            | 3.38223 | 298 |
| ASV-803         | [Clostridium] scindens strain ATCC 35704            | 3.03865 | 308 |
| ASV-815         | [Clostridium] asparagiforme strain N6               | 2.84024 | 306 |
| ASV-678         | [Clostridium] scindens strain ATCC 35704            | 2.32251 | 292 |
| ASV-781         | Neglecta timonensis strain SN17                     | 2.01916 | 280 |
| ASV-651         | [Clostridium] scindens strain ATCC 35704            | 2.01016 | 271 |
| ASV-554         | Blautia faeces strain H05                           | -2.4873 | 267 |
| ASV-521         | Moryellaformis formicigenus strain L-52             | -3.0888 | 279 |
| ASV-575         | Muricoccus intestini strain 2PG-424-CC-1            | -3.0857 | 284 |
| ASV-798         | Murimona intestinalis strain SRB-530-5-H            | -3.0969 | 289 |
| ASV-695         | Ruminococcus lactus ATCC 29178                      | -3.2978 | 288 |
| ASV-588         | Paragaeotheria hongkongensis JCM 14552 strain HKU10 | -3.5708 | 301 |
| ASV-733         | Kineothrix alysoides strain KNHc209                 | -3.5758 | 298 |
| ASV-574         | Blautia faecicola strain KCMDB1111                  | -3.728  | 301 |
| ASV-877         | Murimona intestinalis strain SRB-530-5-H            | -3.8224 | 303 |
| ASV-517         | [Clostridium] scindens strain ATCC 35704            | -4.9538 | 317 |
| ASV-746         | Duncanelia dubosi strain H5                         | -5.8099 | 324 |
| <b>Ileum</b>    |                                                     |         |     |
| ASV-834         | Lactococcus taiwanensis strain 0905C15              | 8.7069  | 193 |
| ASV-654         | Clostridium saudeianae strain JCC                   | 6.96201 | 192 |
| ASV-540         | Turbidibacter sanguinis strain MCL361               | 5.81598 | 189 |
| ASV-526         | Clostridium saudeianae strain JCC                   | 4.60098 | 178 |
| ASV-746         | Duncanelia dubosi strain H5                         | -5.9904 | 190 |
| <b>Cecum</b>    |                                                     |         |     |
| ASV-834         | Lactococcus taiwanensis strain 0905C15              | 7.43633 | 460 |
| ASV-678         | [Clostridium] scindens strain ATCC 35704            | 6.88061 | 428 |
| ASV-542         | [Eubacterium] rectale ATCC 35686                    | 6.38162 | 440 |
| ASV-815         | [Clostridium] asparagiforme strain N6               | 6.325   | 418 |
| ASV-603         | [Clostridium] rectale ATCC 35704                    | 6.28349 | 428 |
| ASV-654         | Clostridium saudeianae strain JCC                   | 6.12195 | 436 |
| ASV-564         | Kineothrix alysoides strain KNHc209                 | 5.75951 | 417 |
| ASV-658         | [Clostridium] scindens strain ATCC 35704            | 5.67119 | 438 |
| ASV-862         | Acetatifactor muris strain CT-m2                    | 5.65718 | 414 |
| ASV-628         | Pseudobutyribacterium ruminis strain DSM 9787       | 5.58964 | 413 |
| ASV-546         | [Clostridium] scindens strain ATCC 35704            | 5.46603 | 431 |
| ASV-706         | [Clostridium] methylpentosum strain R2              | 5.35642 | 416 |
| ASV-653         | Faecalimonas unilobata strain EGH7                  | 5.30522 | 362 |
| ASV-791         | Neglecta timonensis strain SN17                     | 5.285   | 419 |
| ASV-577         | [Clostridium] scindens strain ATCC 35704            | 4.97934 | 415 |
| ASV-695         | [Clostridium] scindens strain ATCC 35704            | 4.9381  | 415 |
| ASV-651         | [Clostridium] scindens strain ATCC 35704            | 4.92577 | 414 |
| ASV-815         | [Eubacterium] rectale ATCC 35686                    | 4.89725 | 415 |
| ASV-540         | Turbidibacter sanguinis strain MCL361               | 4.89784 | 371 |
| ASV-562         | Roseburia intestinalis L1-62                        | 4.88699 | 367 |
| ASV-518         | Procees massiliensis strain Marseille-P2769         | 4.7916  | 401 |
| ASV-854         | Acetatifactor muris strain CT-m2                    | 4.79106 | 404 |
| ASV-681         | Murimona intestinalis strain SRB-530-5-H            | 4.78848 | 411 |
| ASV-526         | Clostridium saudeianae strain JCC                   | 4.7888  | 389 |
| ASV-636         | [Clostridium] asparagiforme strain N6               | 4.72845 | 391 |
| ASV-774         | [Eubacterium] rectale ATCC 35686                    | 4.59478 | 407 |
| ASV-279         | Acetatifactor muris strain CT-m2                    | 4.42648 | 383 |
| ASV-522         | Fusicaeniabacter saccharivorans strain HT03-11      | 4.36441 | 370 |
| ASV-612         | Fusicaeniabacter saccharivorans strain HT03-11      | 4.34419 | 366 |
| ASV-635         | Anaerodigium lactifallicum strain G17               | 4.30498 | 377 |
| ASV-560         | Eubacterium muris strain 420c-B-504-A95             | 4.28862 | 368 |
| ASV-841         | Anaerotruncus ruberiferus strain MT5                | 4.23883 | 403 |
| ASV-722         | Procees massiliensis strain Marseille-P2769         | 4.14799 | 375 |
| ASV-345         | [Clostridium] scindens strain ATCC 35704            | 4.1288  | 353 |
| ASV-822         | [Clostridium] amygdalium strain BR-10               | 3.92265 | 356 |
| ASV-628         | Anaerostipes caecae strain L1-62                    | 3.75191 | 379 |
| ASV-623         | [Clostridium] algalivoryticum strain SPL73          | 3.45523 | 377 |
| ASV-642         | [Clostridium] leptum strain DSM 753                 | 3.33543 | 364 |
| ASV-654         | Anaerotruncus coliformis strain VIAL 14555          | 2.94023 | 347 |
| ASV-578         | Harellitella acetospora strain V02-281a             | 2.79771 | 347 |
| ASV-798         | Murimona intestinalis strain SRB-530-5-H            | -3.8339 | 358 |
| ASV-691         | Intestinibacter massiliensis strain Marseille-P3216 | -3.8547 | 366 |
| ASV-753         | Roseburia hominis A2-183                            | -3.9795 | 370 |
| ASV-731         | [Clostridium] scindens strain ATCC 35704            | -4.0234 | 361 |
| ASV-344         | Anaerodentia torii strain FH02                      | -4.1257 | 364 |
| ASV-834         | Murimona intestinalis strain 2PG-424-CC-1           | -4.2146 | 391 |
| ASV-792         | Bacteroides xylophilus strain X5-1                  | -4.237  | 385 |
| ASV-877         | Murimona intestinalis strain SRB-530-5-H            | -4.2427 | 387 |
| ASV-809         | Anaeroplasmia lactocollum strain JR                 | -4.253  | 395 |
| ASV-574         | Blautia faecicola strain KCMDB1111                  | -4.4011 | 388 |
| ASV-539         | [Clostridium] adenense strain RMA 9741              | -4.4189 | 392 |
| ASV-874         | Roseburia intestinalis L1-62                        | -4.4420 | 397 |
| ASV-895         | Eisenbergella tay strain B060562                    | -5.0762 | 407 |
| ASV-644         | Lachnospirillum pacemense strain Marseille-P3100    | -5.2816 | 434 |
| ASV-575         | Atlepis onderdonki strain JCM 16771                 | -5.8671 | 455 |
| ASV-733         | Kineothrix alysoides strain KNHc209                 | -6.6002 | 462 |
| ASV-649         | [Clostridium] asparagiforme strain N6               | -7.0004 | 462 |
| <b>Colon</b>    |                                                     |         |     |
| ASV-834         | Lactococcus taiwanensis strain 0905C15              | 7.8446  | 463 |
| ASV-678         | [Clostridium] scindens strain ATCC 35704            | 6.71899 | 448 |
| ASV-654         | Clostridium saudeianae strain JCC                   | 6.1597  | 456 |
| ASV-603         | [Clostridium] scindens strain ATCC 35704            | 6.18609 | 452 |
| ASV-542         | [Eubacterium] rectale ATCC 35686                    | 6.05788 | 452 |
| ASV-815         | [Clostridium] asparagiforme strain N6               | 6.04324 | 430 |
| ASV-578         | Clostridium saudeianae strain JCC                   | 5.63171 | 443 |
| ASV-694         | Kineothrix alysoides strain KNHc209                 | 5.18454 | 410 |
| ASV-546         | [Clostridium] scindens strain ATCC 35704            | 4.95055 | 436 |
| ASV-540         | Turbidibacter sanguinis strain MCL361               | 4.86008 | 383 |
| ASV-862         | Acetatifactor muris strain CT-m2                    | 4.88418 | 399 |
| ASV-501         | [Clostridium] scindens strain ATCC 35704            | 4.8869  | 422 |
| ASV-635         | Anaerodigium lactifallicum strain G17               | 4.79195 | 404 |
| ASV-653         | Faecalimonas unilobata strain EGH7                  | 4.73388 | 362 |
| ASV-626         | Pseudobutyribacterium ruminis strain DSM 9787       | 4.7066  | 398 |
| ASV-682         | Roseburia intestinalis L1-62                        | 4.57395 | 374 |
| ASV-791         | Neglecta timonensis strain SN17                     | 4.4431  | 407 |
| ASV-706         | [Clostridium] methylpentosum strain R2              | 4.37904 | 403 |
| ASV-636         | [Clostridium] asparagiforme strain N6               | 4.37358 | 390 |
| ASV-651         | [Clostridium] scindens strain ATCC 35704            | 4.36887 | 412 |
| ASV-756         | Clostridium saudeianae strain JCC                   | 4.33975 | 381 |
| ASV-515         | [Eubacterium] rectale ATCC 35686                    | 4.32743 | 407 |
| ASV-479         | [Clostridium] scindens strain ATCC 35704            | 4.28865 | 408 |
| ASV-595         | [Clostridium] scindens strain ATCC 35704            | 4.17662 | 369 |
| ASV-518         | Procees massiliensis strain Marseille-P2769         | 4.15084 | 393 |
| ASV-518         | Procees massiliensis strain Marseille-P2769         | 4.05091 | 381 |
| ASV-279         | Acetatifactor muris strain CT-m2                    | 4.07757 | 391 |
| ASV-522         | Fusicaeniabacter saccharivorans strain HT03-11      | 4.02569 | 390 |
| ASV-612         | Fusicaeniabacter saccharivorans strain HT03-11      | 3.91294 | 386 |
| ASV-681         | Murimona intestinalis strain SRB-530-5-H            | 3.85038 | 398 |
| ASV-628         | Anaerostipes caecae strain L1-62                    | 3.768   | 381 |
| ASV-654         | Acetatifactor muris strain CT-m2                    | 3.65927 | 371 |
| ASV-722         | Procees massiliensis strain Marseille-P2769         | 3.5043  | 366 |
| ASV-822         | [Clostridium] amygdalium strain BR-10               | 3.43326 | 353 |
| ASV-599         | Oscillibacter ruminalium GH1                        | 3.06444 | 358 |
| ASV-830         | Faecalimonas unilobata strain EGH7                  | 3.02322 | 352 |
| ASV-691         | Intestinibacter massiliensis strain Marseille-P3216 | -3.2442 | 399 |
| ASV-575         | Murimona intestinalis strain 2PG-424-CC-1           | -3.6988 | 371 |
| ASV-539         | [Clostridium] adenense strain RMA 9741              | -3.7447 | 369 |
| ASV-798         | Murimona intestinalis strain SRB-530-5-H            | -3.6241 | 378 |
| ASV-809         | Anaeroplasmia lactocollum strain JR                 | -3.6345 | 378 |
| ASV-746         | Duncanelia dubosi strain H5                         | -3.6567 | 364 |
| ASV-568         | Anaerodentia torii strain FH02                      | -4.1670 | 401 |
| ASV-895         | Eisenbergella tay strain B060562                    | -4.2435 | 396 |
| ASV-877         | Murimona intestinalis strain SRB-530-5-H            | -4.3222 | 394 |
| ASV-574         | Blautia faecicola strain KCMDB1111                  | -4.604  | 427 |
| ASV-644         | Lachnospirillum pacemense strain Marseille-P3100    | -4.9302 | 431 |
| ASV-733         | Kineothrix alysoides strain KNHc209                 | -6.2221 | 462 |
| ASV-649         | [Clostridium] asparagiforme strain N6               | -6.2273 | 459 |
| ASV-526         | Atlepis onderdonki strain JCM 16771                 | -6.4319 | 462 |

\*negative CLR indicates differential abundance for control group.

**Table S5B. ANCOM analysis of differentially abundant Metacys pathways within segments of treatment and control group.**

| Metacys ID      | Metacys pathway                                                   | chr   | W   |
|-----------------|-------------------------------------------------------------------|-------|-----|
| <b>Stomach</b>  |                                                                   |       |     |
| PWY-6876        | isopropanol biosynthesis                                          | 7.82  | 285 |
| PWY-4984        | urea cycle                                                        | 7.33  | 285 |
| PWY-7377        | cob(ly)limate a,c-diamide biosynthesis I (early cobalt insertion) | 6.95  | 285 |
| P441-PWY        | superpathway of N-acetylneuraminate degradation                   | -4.40 | 275 |
| PWY-7371        | 1,4-dihydroxy-6-naphthoate biosynthesis II                        | -5.40 | 284 |
| PWY-6263        | superpathway of menaquinol-8 biosynthesis II                      | -5.90 | 285 |
| <b>Duodenum</b> |                                                                   |       |     |
| PWY-4984        | urea cycle                                                        | 6.35  | 292 |
| PWY-6876        | isopropanol biosynthesis                                          | 6.82  | 292 |
| PWY-7377        | cob(ly)limate a,c-diamide biosynthesis I (early cobalt insertion) | 6.89  | 292 |
| PWY-6876        | isopropanol biosynthesis                                          | 6.89  | 287 |
| PWY-4984        | urea cycle                                                        | 5.81  | 286 |
| PWY-7377        | cob(ly)limate a,c-diamide biosynthesis I (early cobalt insertion) | 6.42  | 286 |
| PWY-6263        | superpathway of menaquinol-8 biosynthesis II                      | -3.07 | 273 |
| <b>Ileum</b>    |                                                                   |       |     |
| PWY-6478        | GDP-D-glycero- $\alpha$ ,D-manno-heptose biosynthesis             | 4.05  | 249 |
| PWY-4353        | purine nucleotides degradation II (aerobic)                       | 4.45  | 232 |
| SLA-VQSDHY      | adenosine nucleotides degradation I                               | 4.83  | 252 |
| PWY-6588        | pyruvate fermentation to acetone                                  | 5.01  | 251 |
| PWY-4984        | urea cycle                                                        | 5.74  | 251 |
| PWY-7377        | cob(ly)limate a,c-diamide biosynthesis I (early cobalt insertion) | 7.14  | 256 |
| PWY-6876        | isopropanol biosynthesis                                          | 7.57  | 256 |
| <b>Cecum</b>    |                                                                   |       |     |
| PWY-5677        | succinate fermentation to butyrate                                | 5.09  | 257 |
| PWY-5022        | 4-aminobutanoate degradation V                                    | 4.85  | 257 |
| PWY-6363        | superpathway of menaquinol-8 biosynthesis II                      | 4.78  | 249 |
| PWY-7371        | 1,4-dihydroxy-6-naphthoate biosynthesis II                        | 4.65  | 249 |
| P441-PWY        | superpathway of menaquinol-8 biosynthesis II                      | 4.63  | 257 |
| PWY-7237        | myc, chro- and scillo-inositol degradation                        | 2.42  | 245 |
| PWY-7377        | cob(ly)limate a,c-diamide biosynthesis I (early cobalt insertion) | -4.48 | 237 |
| PWY-6470        | peptidoglycan biosynthesis V (libero-lactam resistance)           | 3.26  | 237 |
| PWY-5265        | peptidoglycan biosynthesis II (staphylococci)                     | 2.99  | 236 |
| PWY-6877        | myc, chro- and scillo-inositol degradation                        | 2.72  | 242 |
| PWY-7431        | aromatic biogenic amine degradation (bacteria)                    | -3.18 | 245 |
| P441-PWY        | L-glutamate degradation V (via hydroxylglutamate)                 | -3.21 | 242 |
| PWY-6877        | succinate fermentation to butyrate                                | 4.54  | 255 |
| PWY-7371        | 1,4-dihydroxy-6-naphthoate biosynthesis II                        | -5.15 | 253 |
| PWY-6263        | superpathway of menaquinol-8 biosynthesis II                      | -5.39 | 252 |

\*negative CLR indicates differential abundance for control group.
