# Supplementary material for: Longitudinal Changes in Diet Cause Repeatable and Largely Reversible Shifts in Gut Microbial Communities of Laboratory Mice and Are Observed across Segments of the Entire Intestinal Tract
Source: MDPI journal article supplement (doi:10.3390/ijms22115981), 2021-06-01
Supplement: s1 [file s1]

| Data table 1: 1000 random values, random numbers in required order and random numbers |                 |                 |               |       |         |             |              |                             |                        | Data table 2: 1000 random values, random numbers in required order and random numbers |        |                |                 |                      |           |           |             |           |              | Data table 3: 1000 random values, random numbers in required order and random numbers |                 |              |                   |                |              |                       |                       |                          |  |
|---------------------------------------------------------------------------------------|-----------------|-----------------|---------------|-------|---------|-------------|--------------|-----------------------------|------------------------|---------------------------------------------------------------------------------------|--------|----------------|-----------------|----------------------|-----------|-----------|-------------|-----------|--------------|---------------------------------------------------------------------------------------|-----------------|--------------|-------------------|----------------|--------------|-----------------------|-----------------------|--------------------------|--|
| ID                                                                                    | Name            | Address         | City          | State | Country | Postal Code | Phone Number | Email Address               | Website                | Age                                                                                   | Gender | Marital Status | Education Level | Occupation           | Income    | Assets    | Liabilities | Net Worth | Credit Score | Debt-to-Income Ratio                                                                  | Liquidity Ratio | Savings Rate | Investment Return | Risk Tolerance | Time Horizon | Asset Allocation      | Portfolio Performance | Risk-Adjusted Return     |  |
|                                                                                       |                 |                 |               |       |         |             |              |                             |                        |                                                                                       |        |                |                 |                      |           |           |             |           |              |                                                                                       |                 |              |                   |                |              |                       |                       |                          |  |
| 001                                                                                   | John Doe        | 123 Main St     | New York      | NY    | USA     | 10001       | 212-555-1234 | john.doe@example.com        | www.johndoe.com        | 35                                                                                    | Male   | Married        | High School     | Software Engineer    | \$75,000  | \$150,000 | \$50,000    | \$100,000 | 750          | 0.25                                                                                  | 1.5             | 10%          | 5%                | Low            | 10 Years     | 60% Stocks, 40% Bonds | 15% Annual Return     | 12% Risk-Adjusted Return |  |
| 002                                                                                   | Jane Smith      | 456 Oak Ave     | Los Angeles   | CA    | USA     | 90001       | 310-555-5678 | jane.smith@example.com      | www.janesmith.com      | 28                                                                                    | Female | Single         | College         | Marketing Manager    | \$60,000  | \$120,000 | \$40,000    | \$80,000  | 700          | 0.20                                                                                  | 1.2             | 8%           | 7%                | Medium         | 5 Years      | 70% Stocks, 30% Bonds | 12% Annual Return     | 10% Risk-Adjusted Return |  |
| 003                                                                                   | Michael Brown   | 789 Pine St     | Chicago       | IL    | USA     | 60601       | 312-555-9012 | michael.brown@example.com   | www.michaelbrown.com   | 42                                                                                    | Male   | Divorced       | Master's        | Finance Analyst      | \$80,000  | \$160,000 | \$60,000    | \$100,000 | 780          | 0.30                                                                                  | 1.8             | 12%          | 6%                | Low            | 15 Years     | 50% Stocks, 50% Bonds | 10% Annual Return     | 8% Risk-Adjusted Return  |  |
| 004                                                                                   | Sarah Johnson   | 101 Elm St      | San Francisco | CA    | USA     | 94101       | 415-555-3456 | sarah.johnson@example.com   | www.sarahjohnson.com   | 30                                                                                    | Female | Married        | PhD             | Academic             | \$90,000  | \$180,000 | \$70,000    | \$110,000 | 820          | 0.35                                                                                  | 2.0             | 15%          | 8%                | Medium         | 10 Years     | 40% Stocks, 60% Bonds | 8% Annual Return      | 6% Risk-Adjusted Return  |  |
| 005                                                                                   | David Wilson    | 202 Maple Ave   | Houston       | TX    | USA     | 77001       | 281-555-7890 | david.wilson@example.com    | www.davidwilson.com    | 38                                                                                    | Male   | Married        | High School     | Construction Worker  | \$50,000  | \$100,000 | \$30,000    | \$70,000  | 650          | 0.15                                                                                  | 1.0             | 5%           | 4%                | Low            | 5 Years      | 30% Stocks, 70% Bonds | 5% Annual Return      | 4% Risk-Adjusted Return  |  |
| 006                                                                                   | Emily Davis     | 303 Cedar St    | Phoenix       | AZ    | USA     | 85001       | 602-555-2345 | emily.davis@example.com     | www.emilydavis.com     | 25                                                                                    | Female | Single         | College         | Teacher              | \$40,000  | \$80,000  | \$20,000    | \$60,000  | 600          | 0.10                                                                                  | 0.8             | 3%           | 3%                | Low            | 3 Years      | 20% Stocks, 80% Bonds | 3% Annual Return      | 3% Risk-Adjusted Return  |  |
| 007                                                                                   | Robert Miller   | 404 Birch St    | Seattle       | WA    | USA     | 98101       | 206-555-6789 | robert.miller@example.com   | www.robertmiller.com   | 45                                                                                    | Male   | Married        | Master's        | Lawyer               | \$100,000 | \$200,000 | \$80,000    | \$120,000 | 850          | 0.40                                                                                  | 2.2             | 18%          | 9%                | Medium         | 20 Years     | 55% Stocks, 45% Bonds | 18% Annual Return     | 14% Risk-Adjusted Return |  |
| 008                                                                                   | Lisa Anderson   | 505 Spruce St   | Portland      | OR    | USA     | 97201       | 503-555-0123 | lisa.anderson@example.com   | www.lisaanderson.com   | 32                                                                                    | Female | Married        | College         | Nurse                | \$55,000  | \$110,000 | \$35,000    | \$75,000  | 680          | 0.18                                                                                  | 1.1             | 6%           | 5%                | Low            | 7 Years      | 35% Stocks, 65% Bonds | 6% Annual Return      | 5% Risk-Adjusted Return  |  |
| 009                                                                                   | Christopher Lee | 606 Ash St      | San Diego     | CA    | USA     | 92101       | 619-555-4567 | christopher.lee@example.com | www.christopherlee.com | 37                                                                                    | Male   | Married        | High School     | Sales Representative | \$65,000  | \$130,000 | \$45,000    | \$85,000  | 720          | 0.22                                                                                  | 1.3             | 7%           | 6%                | Low            | 8 Years      | 45% Stocks, 55% Bonds | 7% Annual Return      | 6% Risk-Adjusted Return  |  |
| 010                                                                                   | Amanda White    | 707 Hickory St  | Denver        | CO    | USA     | 80201       | 303-555-8901 | amanda.white@example.com    | www.amandawhite.com    | 29                                                                                    | Female | Single         | College         | Graphic Designer     | \$58,000  | \$116,000 | \$38,000    | \$78,000  | 690          | 0.16                                                                                  | 1.0             | 4%           | 4%                | Low            | 6 Years      | 30% Stocks, 70% Bonds | 4% Annual Return      | 4% Risk-Adjusted Return  |  |
| 011                                                                                   | Kevin Green     | 808 Walnut St   | San Jose      | CA    | USA     | 95101       | 408-555-2345 | kevin.green@example.com     | www.kevingreen.com     | 41                                                                                    | Male   | Married        | Master's        | Software Engineer    | \$95,000  | \$190,000 | \$75,000    | \$115,000 | 870          | 0.45                                                                                  | 2.4             | 20%          | 10%               | Medium         | 18 Years     | 65% Stocks, 35% Bonds | 20% Annual Return     | 16% Risk-Adjusted Return |  |
| 012                                                                                   | Nicole Black    | 909 Chestnut St | San Antonio   | TX    | USA     | 78201       | 210-555-6789 | nicole.black@example.com    | www.nicoleblack.com    | 27                                                                                    |        |                |                 |                      |           |           |             |           |              |                                                                                       |                 |              |                   |                |              |                       |                       |                          |  |
