# Supplementary material for: Longitudinal Changes in Diet Cause Repeatable and Largely Reversible Shifts in Gut Microbial Communities of Laboratory Mice and Are Observed across Segments of the Entire Intestinal Tract
Source: MDPI journal article supplement (doi:10.3390/ijms22115981), 2021-06-01
Supplement: s1 [file s1]

**Table S1A. Weight and length of mice at the end of 84 days of the experiment.**

| Mouse | Diet     | Host weight (g) | Length of segments (cm) |                                          |       |       | Total length (cm) |
|-------|----------|-----------------|-------------------------|------------------------------------------|-------|-------|-------------------|
|       |          |                 | Stomach                 | Small Intestine (Duodenum+Jejunum+Ileum) | Cecum | Colon |                   |
| M1    | Standard | 31.5            | 1.5                     | 32.0                                     | 4.0   | 6.5   | 44.0              |
| M2    | Standard | 28.5            | 1.5                     | 34.5                                     | 3.5   | 6.0   | 45.5              |
| M3    | Standard | 32.0            | 1.5                     | 35.0                                     | 3.5   | 7.0   | 47.0              |
| M4    | Standard | 34.1            | 1.5                     | 34.0                                     | 3.5   | 6.5   | 45.5              |
| M5    | Standard | 33.3            | 1.5                     | 36.0                                     | 3.5   | 8.0   | 49.0              |
| M6    | Standard | 34.5            | 2.0                     | 37.5                                     | 3.5   | 7.5   | 50.5              |
| M7    | Standard | 33.4            | 1.5                     | 35.0                                     | 3.5   | 7.5   | 47.5              |
| M8    | Standard | 31.3            | 1.5                     | 36.5                                     | 3.5   | 7.5   | 49.0              |
| M9    | Standard | 34.5            | 1.5                     | 37.0                                     | 3.0   | 6.5   | 48.0              |
| M10   | Standard | 33.0            | 1.5                     | 37.5                                     | 3.0   | 6.5   | 48.5              |
| M11   | Standard | 28.8            | 2.0                     | 33.0                                     | 3.0   | 6.0   | 44.0              |
| M12   | Standard | 34.1            | 1.5                     | 33.0                                     | 3.0   | 6.5   | 44.0              |
| M13   | Western  | 41.1            | 1.0                     | 29.5                                     | 2.0   | 5.0   | 37.5              |
| M14   | Western  | 39.6            | 1.5                     | 32.0                                     | 1.5   | 4.0   | 39.0              |
| M15   | Western  | 40.8            | 1.5                     | 31.0                                     | 1.5   | 5.0   | 39.0              |
| M16   | Western  | 39.8            | 1.0                     | 29.5                                     | 1.5   | 5.0   | 37.0              |
| M17   | Western  | 32.2            | 1.0                     | 24.5                                     | 1.5   | 5.0   | 32.0              |
| M18   | Western  | 45.4            | 1.5                     | 29.5                                     | 1.5   | 6.0   | 38.5              |
| M19   | Western  | 36.2            | 1.0                     | 27.0                                     | 1.5   | 5.0   | 34.5              |
| M20   | Western  | 38.7            | 1.0                     | 29.5                                     | 1.5   | 4.5   | 36.5              |
| M21   | Western  | 38.7            | 1.0                     | 28.5                                     | 1.0   | 5.0   | 35.5              |
| M22   | Western  | 36.7            | 1.5                     | 30.0                                     | 2.0   | 5.5   | 39.0              |
| M23   | Western  | 40.3            | 1.5                     | 28.5                                     | 2.0   | 4.5   | 36.5              |
| M24   | Western  | 37.9            | 1.5                     | 29.0                                     | 1.5   | 5.0   | 37.0              |

**Table S1B. Wilcoxon rank sum test on segment length.**

| Segment, Diet             | Stomach, Standard | Stomach, Western | Small Intestine, Standard | Small Intestine, Western | Cecum, Standard | Cecum, Western | Colon, Standard | Colon, Western |
|---------------------------|-------------------|------------------|---------------------------|--------------------------|-----------------|----------------|-----------------|----------------|
| Stomach, Standard         | -                 | -                | -                         | -                        | -               | -              | -               | -              |
| Stomach, Western          | 0.0042            | -                | -                         | -                        | -               | -              | -               | -              |
| Small Intestine, Standard | 3.80E-05          | 3.80E-05         | -                         | -                        | -               | -              | -               | -              |
| Small Intestine, Western  | 3.80E-05          | 3.80E-05         | 4.40E-05                  | -                        | -               | -              | -               | -              |
| Cecum, Standard           | 3.80E-05          | 3.80E-05         | 3.80E-05                  | 3.80E-05                 | -               | -              | -               | -              |
| Cecum, Western            | 0.9695            | 0.0121           | 3.80E-05                  | 3.80E-05                 | 3.80E-05        | -              | -               | -              |
| Colon, Standard           | 3.80E-05          | 3.80E-05         | 3.90E-05                  | 3.90E-05                 | 3.80E-05        | 3.80E-05       | -               | -              |
| Colon, Western            | 3.80E-05          | 3.80E-05         | 3.80E-05                  | 3.80E-05                 | 3.80E-05        | 3.80E-05       | 3.90E-05        | -              |

: significance FDR-adjusted  $P$ -value < 0.05

**Table S1C. Wilcoxon rank sum test on segment lengths normalized to animal weight.**

| Segment, Diet             | Stomach, Standard | Stomach, Western | Small Intestine, Standard | Small Intestine, Western | Cecum, Standard | Cecum, Western | Colon, Standard | Colon, Western |
|---------------------------|-------------------|------------------|---------------------------|--------------------------|-----------------|----------------|-----------------|----------------|
| Stomach, Standard         | -                 | -                | -                         | -                        | -               | -              | -               | -              |
| Stomach, Western          | 4.10E-05          | -                | -                         | -                        | -               | -              | -               | -              |
| Small Intestine, Standard | 4.10E-05          | 4.10E-05         | -                         | -                        | -               | -              | -               | -              |
| Small Intestine, Western  | 4.10E-05          | 4.10E-05         | 2.30E-06                  | -                        | -               | -              | -               | -              |
| Cecum, Standard           | 4.10E-05          | 4.10E-05         | 2.30E-06                  | 2.30E-06                 | -               | -              | -               | -              |
| Cecum, Western            | 0.0303            | 0.0123           | 2.30E-06                  | 2.30E-06                 | 2.30E-06        | -              | -               | -              |
| Colon, Standard           | 4.10E-05          | 4.10E-05         | 4.10E-05                  | 4.10E-05                 | 4.10E-05        | 4.10E-05       | -               | -              |
| Colon, Western            | 4.10E-05          | 4.10E-05         | 2.30E-06                  | 2.30E-06                 | 0.0015          | 2.30E-06       | 4.10E-05        | -              |

: significance FDR-adjusted  $P$ -value < 0.05
